# Supplementary material
Source: PubMed Central journal article supplement (PMC2672552)
Supplement: 0902005106_0902005106SI.pdf [file 0902005106_0902005106SI.pdf]

# Supporting Information

Johnson et al. 10.1073/pnas.0902005106

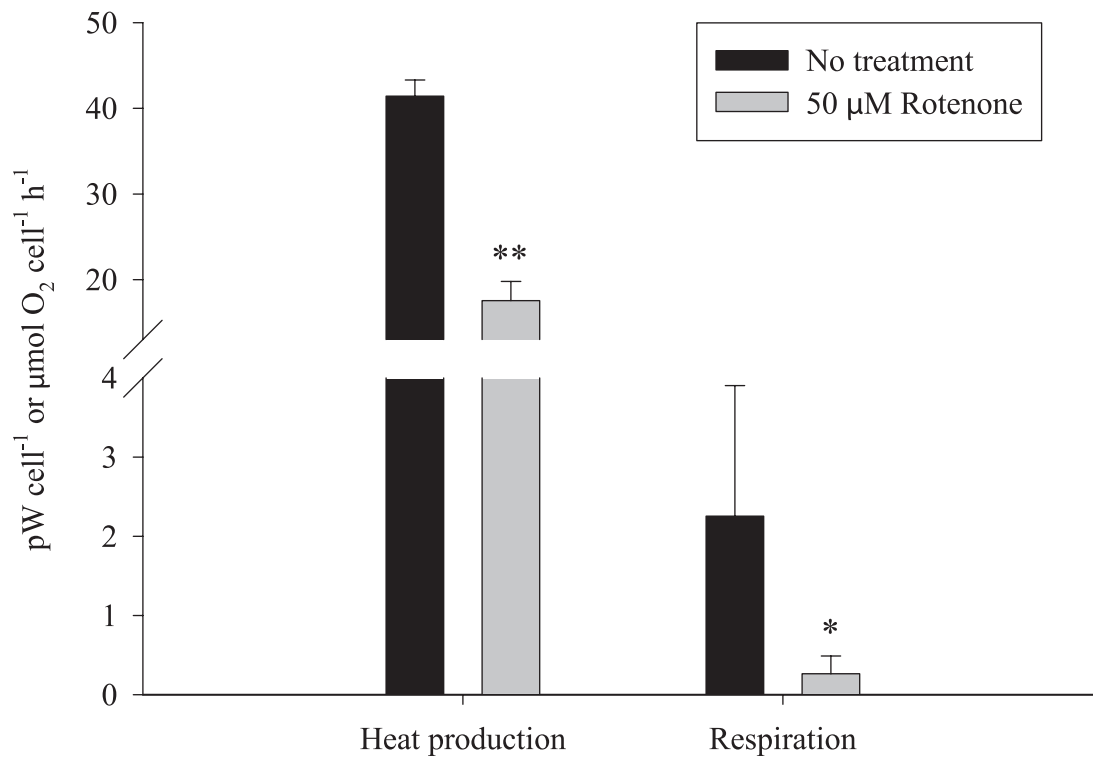

**Fig. S1.** The effects of rotenone (50 μM) on heat production (pW cell<sup>-1</sup>) and respiration (μmol O<sub>2</sub> cell<sup>-1</sup> h<sup>-1</sup>) in *Myrionecta rubra*. Values are mean ± standard deviation ( $n = 3$ ). \*\*  $P < 0.01$  as determined with a two-tailed  $t$ -test.

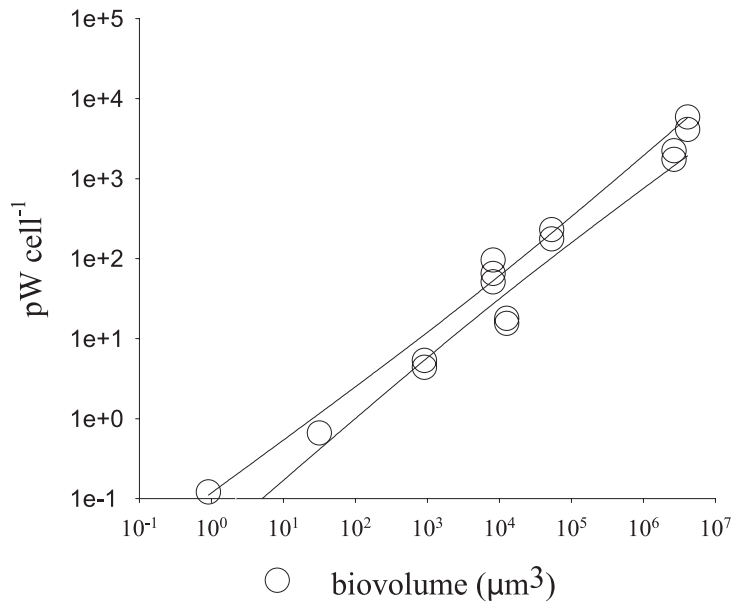

**Fig. S2.** Heat production compared with surface area of eight protist species measured by microcalorimetry. Heat production measured by microcalorimetry, normalized to cell number, and plotted against cellular volume ( $\mu\text{m}^3$ ), for the marine phototrophic protists (from left to right) *Micromonas pusilla* (chlorophyte) ( $n = 2$ ), *Thalassiosira pseudonana* (diatom) ( $n = 1$ ), *Geminigera cryophila* (cryptomonad) ( $n = 2$ ), *Myrionecta rubra* (ciliate) ( $n = 3$ ), *Coscinodiscus* sp. (diatom) ( $n = 2$ ), *Akashiwo sanguinea* (dinoflagellate) ( $n = 2$ ), *Coscinodiscus wailesii* (diatom) ( $n = 2$ ), and *Pyrocystis noctiluca* (dinoflagellate) ( $n = 2$ ). A linear regression was performed, yielding a slope of 0.720 ( $r^2$  0.9698).
